# Supplementary material
Source: PubMed Central journal article supplement (PMC3944829)
Supplement: NIHMS552961-supplement-401_2013_1240_MOESM1_ESM.pdf [file NIHMS552961-supplement-401_2013_1240_MOESM1_ESM.pdf]

**Electronic Supplementary Material**

***TMEM106B* protects *C9ORF72* expansion carriers against frontotemporal dementia**

Marka van Blitterswijk, Bianca Mullen, Alexandra M. Nicholson, Kevin F. Bieniek, Michael G. Heckman, Matthew C. Baker, Mariely DeJesus-Hernandez, NiCole A. Finch, Patricia H. Brown, Melissa E. Murray, Ging-Yuek R. Hsiung, Heather Stewart, Anna M. Karydas, Elizabeth Finger, Andrew Kertesz, Eileen H. Bigio, Sandra Weintraub, Marsel Mesulam, Kimmo J. Hatanpaa, Charles L. White III, Michael J. Strong, Thomas G. Beach, Zbigniew K. Wszolek, Carol Lippa, Richard Caselli, Leonard Petrucelli, Keith A. Josephs, Joseph E. Parisi, David S. Knopman, Ronald C. Petersen, Ian R. Mackenzie, William W. Seeley, Lea T. Grinberg, Bruce L. Miller, Kevin B. Boylan, Neill R. Graff-Radford, Bradley F. Boeve, Dennis W. Dickson, and Rosa Rademakers

**Corresponding author:** Rosa Rademakers, PhD, Department of Neuroscience, Mayo Clinic, 4500 San Pablo Road, Jacksonville, FL 32224, USA. Email: Rademakers.Rosa@mayo.edu

**Contents:** Online Resource Table 1-2

**Table 1: Associations of *TMEM106B* rs3173615 with disease when considering rs3173615 under a recessive model – analysis of extended cohort 1 (260 probands and 786 controls) and cohort 2 (586 patients and 1,302 controls)**

| Group                                                                                                                                 | <i>TMEM106B</i> rs3173615 genotype information |       |             |             |             | Comparison with controls under a recessive model |         |
|---------------------------------------------------------------------------------------------------------------------------------------|------------------------------------------------|-------|-------------|-------------|-------------|--------------------------------------------------|---------|
|                                                                                                                                       | N                                              | MAF   | CC          | CG          | GG          | OR (95% CI)                                      | P-value |
| <b>Cohort 1</b> – all available controls and <i>C9ORF72</i> repeat expansion carrier probands (FTD, FTD/MND, MND)                     |                                                |       |             |             |             |                                                  |         |
| Controls                                                                                                                              | 786                                            | 40.5% | 285 (36.3%) | 366 (46.5%) | 135 (17.2%) | 1.00 (reference)                                 | N/A     |
| FTD, FTD/MND, and MND patients                                                                                                        | 260                                            | 38.8% | 89 (34.2%)  | 140 (53.8%) | 31 (11.9%)  | 0.66 (0.43 – 0.99)                               | 0.044   |
| FTD patients                                                                                                                          | 69                                             | 35.5% | 25 (36.2%)  | 39 (56.5%)  | 5 (7.2%)    | 0.38 (0.15 – 0.96)                               | 0.020   |
| FTD/MND patients                                                                                                                      | 71                                             | 42.3% | 17 (23.9%)  | 48 (67.6%)  | 6 (8.5%)    | 0.44 (0.16 – 0.97)                               | 0.040   |
| MND patients                                                                                                                          | 120                                            | 38.8% | 47 (39.2%)  | 53 (44.2%)  | 20 (16.7%)  | 0.97 (0.58 – 1.62)                               | 0.91    |
| <b>Cohort 2</b> – all available controls and FTD or FTD/MND patients without <i>C9ORF72</i> repeat expansions or <i>GRN</i> mutations |                                                |       |             |             |             |                                                  |         |
| Controls                                                                                                                              | 1302                                           | 41.4% | 464 (35.6%) | 598 (45.9%) | 240 (18.4%) | 1.00 (reference)                                 | N/A     |
| FTD and FTD/MND patients                                                                                                              | 586                                            | 39.3% | 213 (36.3%) | 285 (48.6%) | 88 (15.0%)  | 0.78 (0.60 – 1.02)                               | 0.068   |
| FTD patients                                                                                                                          | 531                                            | 39.8% | 187 (35.2%) | 265 (49.9%) | 79 (14.9%)  | 0.77 (0.59 – 1.02)                               | 0.065   |
| Pathologically diagnosed                                                                                                              | 101                                            | 30.6% | 45 (44.6%)  | 50 (49.5%)  | 6 (5.9%)    | 0.27 (0.12 – 0.63)                               | <0.001  |
| Clinically diagnosed                                                                                                                  | 430                                            | 42.0% | 142 (33.0%) | 215 (50.0%) | 73 (17.0%)  | 0.92 (0.69 – 1.22)                               | 0.55    |

FTD=frontotemporal dementia; MND=motor neuron disease; OR=odds ratio; CI=confidence interval; MAF=minor allele frequency. ORs, 95% CIs, and p-values result from logistic regression models where rs3173615 was considered under a recessive model (GG vs. CC or CG). For cohort 1, models were adjusted for gender. For cohort 2, models were adjusted for age (age at blood draw in controls, age at diagnosis in clinically diagnosed patients, and age at death in pathologically diagnosed patients) and gender.

**Table 2: Associations of *TMEM106B* rs3173615 with disease when considering rs3173615 under other models**

| Group                                                                                                                   | N   | MAF   | Comparison with controls under an additive model |         | Comparison with controls under a dominant model |         | Comparison with controls under a co-dominant model: CG vs. CC |         | Comparison with controls under a co-dominant model: GG vs. CC |         |  |
|-------------------------------------------------------------------------------------------------------------------------|-----|-------|--------------------------------------------------|---------|-------------------------------------------------|---------|---------------------------------------------------------------|---------|---------------------------------------------------------------|---------|--|
|                                                                                                                         |     |       | OR (95% CI)                                      | P-value | OR (95% CI)                                     | P-value | OR (95% CI)                                                   | P-value | OR (95% CI)                                                   | P-value |  |
| <b>Cohort 1</b> – controls and <i>C9ORF72</i> repeat expansion carrier probands (FTD, FTD/MND, MND)                     |     |       |                                                  |         |                                                 |         |                                                               |         |                                                               |         |  |
| Controls                                                                                                                | 376 | 43.2% | 1.00 (reference)                                 | N/A     | 1.00 (reference)                                | N/A     | 1.00 (reference)                                              | N/A     | 1.00 (reference)                                              | N/A     |  |
| FTD, FTD/MND, and MND patients                                                                                          | 260 | 38.8% | 0.83 (0.66 – 1.05)                               | 0.11    | 0.94 (0.67 – 1.31)                              | 0.70    | 1.07 (0.75 – 1.52)                                            | 0.70    | 0.60 (0.36 – 0.99)                                            | 0.044   |  |
| FTD patients                                                                                                            | 69  | 35.5% | 0.72 (0.49 – 1.05)                               | 0.087   | 0.86 (0.50 – 1.47)                              | 0.57    | 1.06 (0.61 – 1.85)                                            | 0.83    | 0.35 (0.12 – 0.93)                                            | 0.036   |  |
| FTD/MND patients                                                                                                        | 71  | 42.3% | 0.96 (0.66 – 1.39)                               | 0.83    | 1.55 (0.86 – 2.80)                              | 0.13    | 1.94 (1.07 – 3.55)                                            | 0.030   | 0.60 (0.23 – 1.59)                                            | 0.30    |  |
| MND patients                                                                                                            | 120 | 38.8% | 0.83 (0.62 – 1.12)                               | 0.22    | 0.75 (0.49 – 1.14)                              | 0.18    | 0.76 (0.48 – 1.19)                                            | 0.23    | 0.73 (0.40 – 1.32)                                            | 0.30    |  |
| <b>Cohort 2</b> – controls and FTD or FTD/MND patients without <i>C9ORF72</i> repeat expansions or <i>GRN</i> mutations |     |       |                                                  |         |                                                 |         |                                                               |         |                                                               |         |  |
| Controls                                                                                                                | 765 | 41.0% | 1.00 (reference)                                 | N/A     | 1.00 (reference)                                | N/A     | 1.00 (reference)                                              | N/A     | 1.00 (reference)                                              | N/A     |  |
| FTD and FTD/MND patients                                                                                                | 586 | 39.3% | 0.93 (0.80 – 1.09)                               | 0.38    | 1.01 (0.81 – 1.26)                              | 0.94    | 1.09 (0.86 – 1.39)                                            | 0.47    | 0.81 (0.59 – 1.12)                                            | 0.20    |  |
| FTD patients                                                                                                            | 531 | 39.8% | 0.95 (0.81 – 1.11)                               | 0.54    | 1.06 (0.84 – 1.34)                              | 0.61    | 1.16 (0.91 – 1.48)                                            | 0.23    | 0.83 (0.59 – 1.15)                                            | 0.26    |  |
| Pathologically diagnosed                                                                                                | 101 | 30.6% | 0.66 (0.48 – 0.90)                               | 0.008   | 0.75 (0.49 – 1.16)                              | 0.20    | 0.98 (0.63 – 1.53)                                            | 0.92    | 0.26 (0.10 – 0.62)                                            | 0.003   |  |
| Clinically diagnosed                                                                                                    | 430 | 42.0% | 1.05 (0.89 – 1.24)                               | 0.59    | 1.17 (0.91 – 1.51)                              | 0.21    | 1.23 (0.95 – 1.61)                                            | 0.21    | 1.03 (0.73 – 1.46)                                            | 0.88    |  |

FTD=frontotemporal dementia; MND=motor neuron disease; OR=odds ratio; CI=confidence interval; MAF=minor allele frequency. ORs, 95% CIs, and p-values result from logistic regression models where rs3173615 was considered under an additive model (effect of each additional G allele), a dominant model (CG or GG vs. CC), and a co-dominant model (CG vs. CC and GG vs. CC separately). For cohort 1, models were adjusted for gender. For cohort 2, models were adjusted for age (age at blood draw in controls, age at diagnosis in clinically diagnosed patients, and age at death in pathologically diagnosed patients) and gender.
